# Supplementary material
Source: PubMed Central journal article supplement (PMC8477379)

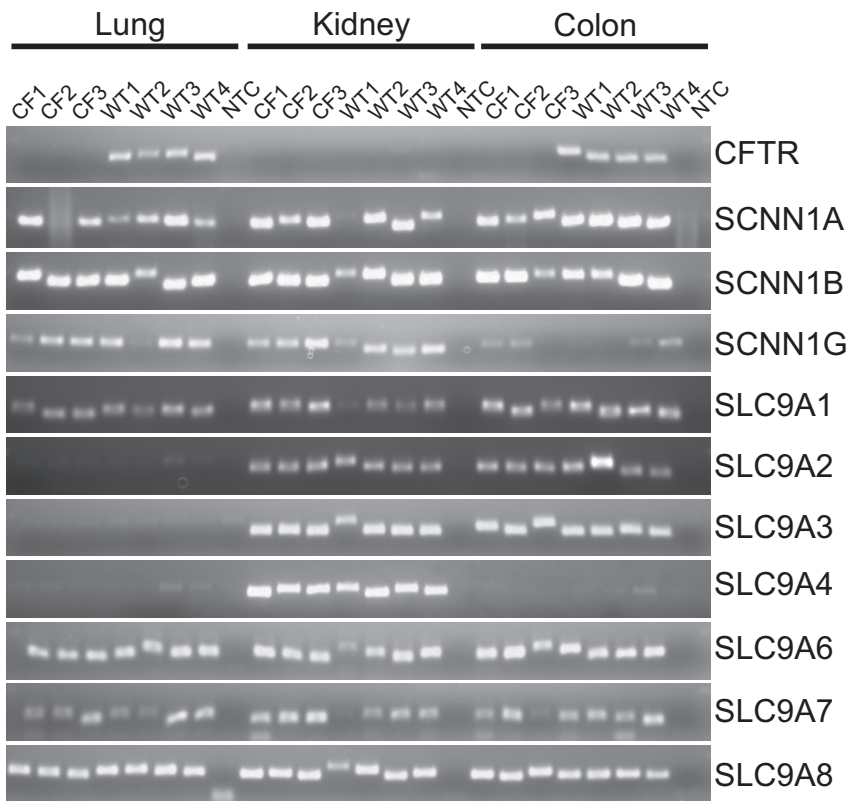

Supplement: NIHMS1738538-supplement-Supplementary_figures.pdf [file NIHMS1738538-supplement-Supplementary_figures.pdf]
